# Supplementary material for: Prevalence and Risk Factors for ESBL/AmpC-E. coli in Pre-Weaned Dairy Calves on Dairy Farms in Germany
Source: Microorganisms. 2021 Oct 12;9(10):2135. doi: 10.3390/microorganisms9102135 (PMC8539614; doi:10.3390/microorganisms9102135)
Supplement: Supplementary file 1 [file microorganisms-09-02135-s001.zip › Supplement_1.pdf]

**Supplement 1:** Total number of calves within the farms aged 7-28 days at the time of sampling and the sample size calculated using an estimated prevalence of 10%, a confidence Level of 95%, and a desired precision of 5%.

| farm | total number of calves<br>on farm at date of<br>sampling | sample size<br>calculated | calves<br>sampled |
|------|----------------------------------------------------------|---------------------------|-------------------|
| 1    | 65                                                       | 45                        | 45                |
| 2    | 6                                                        | 6                         | 6                 |
| 3    | 8                                                        | 8                         | 8                 |
| 4    | 20                                                       | 18                        | 18                |
| 5    | 12                                                       | 12                        | 12                |
| 6    | 8                                                        | 8                         | 8                 |
| 7    | 10                                                       | 10                        | 10                |
| 8    | 7                                                        | 7                         | 7                 |
| 9    | 5                                                        | 5                         | 5                 |
| 10   | 25                                                       | 22                        | 22                |
| 11   | 27                                                       | 23                        | 23                |
| 12   | 24                                                       | 21                        | 21                |
| 13   | 46                                                       | 35                        | 35                |
| 14   | 59                                                       | 42                        | 42                |
| 15   | 32                                                       | 27                        | 27                |
| 16   | 24                                                       | 21                        | 21                |
| 17   | 37                                                       | 30                        | 30                |
| 18   | 17                                                       | 16                        | 16                |
| 19   | 31                                                       | 26                        | 26                |
| 20   | 10                                                       | 10                        | 10                |
| 21   | 16                                                       | 15                        | 15                |
| 22   | 7                                                        | 7                         | 7                 |
| 23   | 14                                                       | 13                        | 13                |
| 24   | 32                                                       | 27                        | 27                |
| 25   | 11                                                       | 11                        | 11                |
| 26   | 15                                                       | 14                        | 14                |
| 27   | 24                                                       | 21                        | 21                |
| 28   | 24                                                       | 21                        | 21                |
| 29   | 13                                                       | 12                        | 12                |
| 30   | 10                                                       | 10                        | 10                |
| 31   | 28                                                       | 24                        | 24                |
| 32   | 21                                                       | 19                        | 19                |
| 33   | 19                                                       | 17                        | 17                |
| 34   | 30                                                       | 25                        | 25                |
| 35   | 5                                                        | 5                         | 5                 |
| 36   | 32                                                       | 27                        | 27                |
| 37   | 36                                                       | 29                        | 29                |
| 38   | 14                                                       | 13                        | 13                |

|           |    |    |    |
|-----------|----|----|----|
| <b>39</b> | 32 | 27 | 27 |
| <b>40</b> | 15 | 14 | 14 |
| <b>41</b> | 19 | 17 | 17 |
| <b>42</b> | 94 | 57 | 57 |
| <b>43</b> | 11 | 11 | 11 |
| <b>44</b> | 23 | 20 | 20 |
| <b>45</b> | 27 | 23 | 23 |
| <b>46</b> | 63 | 44 | 44 |
| <b>47</b> | 21 | 19 | 19 |
| <b>48</b> | 39 | 31 | 31 |
| <b>49</b> | 19 | 22 | 22 |
| <b>50</b> | 30 | 25 | 25 |
| <b>51</b> | 53 | 39 | 39 |
| <b>52</b> | 22 | 19 | 19 |
| <b>53</b> | 9  | 9  | 9  |
| <b>54</b> | 28 | 24 | 24 |
| <b>55</b> | 32 | 27 | 27 |
| <b>56</b> | 20 | 18 | 18 |
| <b>57</b> | 14 | 13 | 13 |
| <b>58</b> | 24 | 21 | 21 |
| <b>59</b> | 27 | 23 | 23 |
| <b>60</b> | 17 | 16 | 16 |
| <b>61</b> | 24 | 21 | 21 |
| <b>62</b> | 31 | 26 | 26 |
| <b>63</b> | 8  | 8  | 8  |
| <b>64</b> | 32 | 27 | 27 |
| <b>65</b> | 27 | 23 | 23 |
| <b>66</b> | 37 | 30 | 30 |
| <b>67</b> | 7  | 7  | 7  |
| <b>68</b> | 17 | 16 | 16 |
| <b>69</b> | 33 | 27 | 27 |
| <b>70</b> | 17 | 16 | 16 |
| <b>71</b> | 12 | 12 | 12 |
| <b>72</b> | 8  | 8  | 8  |

---
