# Supplementary material for: Prevalence and Risk Factors for ESBL/AmpC-E. coli in Pre-Weaned Dairy Calves on Dairy Farms in Germany
Source: Microorganisms. 2021 Oct 12;9(10):2135. doi: 10.3390/microorganisms9102135 (PMC8539614; doi:10.3390/microorganisms9102135)
Supplement: Supplementary file 1 [file microorganisms-09-02135-s001.zip › Supplement_2.pdf]

**Supplement 2.** Questionnaire of the study Prevalence and risk factors for the occurrence of ESBL *E. coli* in pre-weaned dairy calves and their dams on large dairy farms in Germany - a cross-sectional study

Data of the participants

---

---

**General Data**

- ☐ conventional farming
- ☐ organic farming (since \_\_\_\_\_)

■ Are the other livestock husbandries within a radius of 3 km?

- ☐ yes, \_\_\_\_\_ (species)
- ☐ no

■ Frequently buy-in of cattle?

- ☐ yes   ☐ no

If yes, how often?

- ☐ more than once a month
- ☐ every 1-3 months
- ☐ less than every 3 months

Information of the origin farm/s

- ☐ only 1 origin farm
- ☐ > 1 fixed origin farms
- ☐ > 1 changing farms

■ Outsourced heifer rearing?

- ☐ yes   ☐ no

If yes, in

- ☐ another location of the own farm
- ☐ an external farm

☐ heifers are raised at more than 1 location \_\_\_\_\_ (number)

☐ there are "foreign" animals at this location

■ Which animals feeds are used for calves and cows:

☐ in-house basic forage \_\_\_\_\_

☐ in-house substrates \_\_\_\_\_

☐ external basic forage \_\_\_\_\_

☐ external substrates \_\_\_\_\_

☐ bought in forage comes from a single farm

☐ bought in forage comes from different farms

How often do the producers change?

☐ > 1 x / month

☐ every 1-3 months

☐ less than every 3 months

■ Fertilization of the fields that are used for the feed/bedding material production

☐ in-house slurry

☐ external slurry

■ Does an in-house biogas reactor exist?

☐ yes   ☐ no

If yes, do you use in-house material exclusively?

☐ yes   ☐ no, \_\_\_\_\_

Are the fields that are used for feed production or bedding material fertilized with the outcome of the biogas plant, that were fed with foreign slurry/manure?

☐ yes   ☐ no

How many foreign husbandries are involved?

☐ 1-3

☐ more than 3

How often do foreign husbandries change?

- ☐ never
- ☐ more than every 3 months
- ☐ less than every 3 months

Which foreign husbandries are we talking about? (species)

- ☐ \_\_\_\_\_
- ☐ \_\_\_\_\_
- ☐ \_\_\_\_\_

■ Which people have contact with the livestock animals?

- ☐ personnel
- ☐ veterinarian
- ☐ family members
- ☐ visitors (e. g. providers, craftsman)

Do this people have contact to other animals?

- ☐ yes, to \_\_\_\_\_ (species)
- ☐ no

■ Do you perform pest control?

- ☐ yes, \_\_\_\_\_
- ☐ no

### **Calving management**

- Housing:
- |                                     |                                 |
|-------------------------------------|---------------------------------|
| <input type="radio"/> single pen    | <input type="radio"/> group pen |
| <input type="radio"/> straw bedding | <input type="radio"/> _____     |

### **Hygiene-management:**

Cleaning frequency?

- ☐ after each birth
- ☐ more than once a week
- ☐ less than once a week

How long do calves stay with their dams after calving?

- ☐ <1h
- ☐ 1-3h
- ☐ >3h

Co-husbandry of calving and dry cows?

- ☐ yes, in more than half of the calvings
- ☐ yes, in less than half of the calvings
- ☐ no

Co-husbandry of calving and sick cows?

- ☐ yes, in more than half of the calvings
- ☐ yes, in less than half of the calvings
- ☐ no

### **Calves up to 28d**

#### **Housing:**

- ☐ single Igloo (\_\_\_\_%)   ☐ single pen (\_\_\_\_%)
- ☐ group Igloo (\_\_\_\_%)   ☐ group pen (\_\_\_\_%)

#### **■Change of the housing:**

- ☐ 2 weeks
- ☐ no change
- ☐ \_\_\_\_\_

#### **New housing:**

- ☐ group igloo (\_\_\_\_%)
- ☐ group pen (\_\_\_\_%)

#### **■Floor:**

- ☐ concrete floor
- ☐ natural floor

■ Bedding material and frequency:

- ☐ straw
- ☐ daily bedding
- ☐ bedding if necessary

■ Direct contact to other calves:

- ☐ yes
- ☐ no

■ Number of calves per group:

- ☐ calve-feedlot Ratio >1:1
- ☐ calve-feedlot Ratio <1:1

■ Direct contact to other animals

- ☐ yes
- ☐ no
- ☐ \_\_\_\_\_ (species)

■ All-in-all-out-principle

- ☐ yes
- ☐ no

If yes,

- ☐ all calves
- ☐ not for all calves (\_\_\_\_%)

**Feeding:**

■ Colostrum feeding:

- ☐ immediately after birth
- ☐ until 3 h after birth
- ☐ later than 3 h

☐ colostrum of the own dam (☐ milked off ☐ directly from the dam)

☐ colostrum stored frozen and defrosted

☐ colostrum stored in the refrigerator

☐ colostrum is pasteurized

☐ colostrum is acidified (with \_\_\_\_\_)

☐ the dams have been present on the farm for at least 3 weeks before birth

☐ foreign colostrum is occasionally used

origin farm: \_\_\_\_\_

How often? \_\_\_\_\_ How many calves? \_\_\_\_\_)

☐ check of colostrum quality

How? \_\_\_\_\_

How much colostrum do calves receive? \_\_\_\_\_

How?

☐ drench

☐ nursing bucket

Further feeding management:

☒ ☐ all calves ☐ heifer calves

Age: from \_\_\_\_\_ to \_\_\_\_\_

☐ raw milk

☐ waste milk (antibiotic residues)

☐ waste milk (without antibiotic residues)

☐ milk replacer

☐ \_\_\_ x per day, \_\_\_\_\_ (volume)

☐ ad libitum

☐ milk is pasteurized

☐ milk is acidified

Age: From \_\_\_\_\_ to \_\_\_\_\_

☐ raw milk

☐ waste milk (antibiotic residues)

☐ waste milk (without antibiotic residues)

☐ milk replacer

☐ \_\_ x per day, \_\_\_\_\_(volume)

☐ ad libitum

☐ milk is pasteurized

☐ milk is acidified

■ ☐ male calves

Age: From \_\_\_\_\_ to \_\_\_\_\_

☐ raw milk

☐ waste milk (antibiotic residues)

☐ waste milk (without antibiotic residues)

☐ milk replacer

☐ \_\_ x per day, \_\_\_\_\_(volume)

☐ ad libitum

☐ milk is pasteurized

☐ milk is acidified

Age: From \_\_\_\_\_ to \_\_\_\_\_

☐ raw milk

☐ waste milk (antibiotic residues)

☐ waste milk (without antibiotic residues)

☐ milk replacer

☐ \_\_\_ x per day, \_\_\_\_\_(volume)

☐ ad libitum

☐ milk is pasteurized

☐ milk is acidified

■Feeding practice?

☐ always at fixed times

☐ irregularly

☐ use of automatic feeder (☐ freshly prepared, ☐ stored)

■How is the calf feeder cleaned and disinfected?

☐ no cleaning and disinfection

☐ with water only

☐ with cleaning agent

☐ with cleaning and disinfectant

How often is the calf feeder cleaned and disinfected?

☐ after each meal

☐ 1 x / day

☐ < 1 x / day

■Do calves receive supplementary feed?

☐ yes, roughage from day \_\_\_\_\_

☐ yes, concentrate from day \_\_\_\_\_

☐ no

What is used to prepare the milk replacer?

☐ tap water

☐ well water

■Do the calves have free water access?

☐ yes   ☐ no

- ☐ tap water
- ☐ well water

■ Which people take care of the calves?

- ☐ number \_\_\_\_\_
- ☐ trained                      ☐ untrained
- ☐ changing                      ☐ constant

Use of protective clothing?

- ☐ yes
- ☐ no

■ Use of preventive treatment for calves?

- ☐ yes,  
\_\_\_\_\_  
\_\_\_\_\_  
\_\_\_\_\_
- ☐ no

How do you assess calf health? What are the biggest problems?

---

---

What do you do about it?

---

---

Use of treatment schedules for calves?

- ☐ yes
- ☐ no

---

---

**Cows**

**Housing systems:**

- ☐ cubicle housing system (\_\_\_\_%)
- ☐ deep-bedded straw yard housing system (\_\_\_\_%)
- ☐ flat floors (\_\_\_\_%)    ☐ slatted floors (\_\_\_\_%)
- ☐ high cubicle beds (\_\_\_\_%)    ☐ low cubicle beds (\_\_\_\_%)
- ☐ straw (\_\_\_\_%)
- ☐ sawdust (\_\_\_\_%)
- ☐ \_\_\_\_\_
- ☐ lime (\_\_\_\_%)
- ☐ pasture (\_\_\_\_%)

**Dry-off-management:**

Cows are dried with antibiotic treatment \_\_\_\_\_(name)

Use of teat sealant?

- ☐ yes
- ☐ no

Cows are dried \_\_\_\_\_ days/weeks before birth date.

Use of maternal vaccinations?

- ☐ yes, Rota/Corona/E.coli
- ☐ yes, \_\_\_\_\_
- ☐ no

**Milking routine:**

Udder preparation:

- ☐ dry cleaning
- ☐ wet cleaning \_\_\_\_\_
- ☐ pre-dip
- ☐ milked by hand
- ☐ stimulated per brush \_\_\_\_\_

Use of post-milking treatment

☐ yes, with \_\_\_\_\_

☐ dip

☐ spray

Use of milking cluster disinfection

☐ yes, with \_\_\_\_\_

☐ no

Use of separate milking parlor for sick cows?

☐ yes

☐ no

How is the milking order?

☐ cows with waste milk at the end

☐ cows with high somatic cell count at the end

☐ mixed order

**Health management:**

Use of preventive treatment for cows?

☐ yes, \_\_\_\_\_ (\_\_\_\_%)

☐ no

Use of treatment schedules for cows?

☐ yes

☐ no

Is every clinical mastitis treated with antibiotics?

☐ yes, with \_\_\_\_\_ (\_\_\_\_%)

☐ no

Other treatment schedules:

---

---

If a treatment doesn't improve the health of the animal, when do you change the antibiotic treatment?

- ☐ never (\_\_\_\_%)
- ☐ after 1 day (\_\_\_\_%)
- ☐ after 2 days (\_\_\_\_%)
- ☐ after 3 days (\_\_\_\_%)
- ☐ only after completion of the treatment (\_\_\_\_%)

Use of alternative treatment methods, e. g. homeopathy?

- ☐ yes, \_\_\_\_\_ (\_\_\_\_%)
- ☐ no

Housing of the cows producing waste milk?

- ☐ in the regular group (\_\_\_\_%)
- ☐ separated with other waste milk cows (\_\_\_\_%)
- ☐ separated with other cows, that were treated with antibiotics (\_\_\_\_%)

### **Cleaning and disinfection management:**

How does the cleaning and disinfection proceed?

| Calving pen                                                                                                                                                                                                                                           | Calf housing                                                                                                                                                                                                                                          | Milking parlor                                                                                                                                                                                                                                        |
|-------------------------------------------------------------------------------------------------------------------------------------------------------------------------------------------------------------------------------------------------------|-------------------------------------------------------------------------------------------------------------------------------------------------------------------------------------------------------------------------------------------------------|-------------------------------------------------------------------------------------------------------------------------------------------------------------------------------------------------------------------------------------------------------|
| <p>Cleaner</p> <p><input type="radio"/> we do not use any cleaning agent</p> <p>Exposure time</p> <p><input type="radio"/> shorter than the manufacturer's instructions</p> <p><input type="radio"/> according to the manufacturer's instructions</p> | <p>Cleaner</p> <p><input type="radio"/> we do not use any cleaning agent</p> <p>Exposure time</p> <p><input type="radio"/> shorter than the manufacturer's instructions</p> <p><input type="radio"/> according to the manufacturer's instructions</p> | <p>Cleaner</p> <p><input type="radio"/> we do not use any cleaning agent</p> <p>Exposure time</p> <p><input type="radio"/> shorter than the manufacturer's instructions</p> <p><input type="radio"/> according to the manufacturer's instructions</p> |
| Is there complete dry-through?                                                                                                                                                                                                                        | Is there complete dry-through?                                                                                                                                                                                                                        | Is there complete dry-through?                                                                                                                                                                                                                        |

|                                                                                                                                                                                                                                              |                                                                                                                                                                                                                                              |                                                                                                                                                                                                                                              |
|----------------------------------------------------------------------------------------------------------------------------------------------------------------------------------------------------------------------------------------------|----------------------------------------------------------------------------------------------------------------------------------------------------------------------------------------------------------------------------------------------|----------------------------------------------------------------------------------------------------------------------------------------------------------------------------------------------------------------------------------------------|
| <input type="radio"/> yes<br><input type="radio"/> no                                                                                                                                                                                        | <input type="radio"/> yes<br><input type="radio"/> no                                                                                                                                                                                        | <input type="radio"/> yes<br><input type="radio"/> no                                                                                                                                                                                        |
| Disinfectant<br><br><input type="radio"/> we do not use a disinfectant<br><br>Exposure time<br><input type="radio"/> shorter than the manufacturer's instructions<br><input type="radio"/> according to the manufacturer's instructions      | Disinfectant<br><br><input type="radio"/> we do not use a disinfectant<br><br>Exposure time<br><input type="radio"/> shorter than the manufacturer's instructions<br><input type="radio"/> according to the manufacturer's instructions      | Disinfectant<br><br><input type="radio"/> we do not use a disinfectant<br><br>Exposure time<br><input type="radio"/> shorter than the manufacturer's instructions<br><input type="radio"/> according to the manufacturer's instructions      |
| Use of cleaning and disinfection plan<br><br><input type="radio"/> yes<br><input type="radio"/> no                                                                                                                                           | Use of cleaning and disinfection plan<br><br><input type="radio"/> yes<br><input type="radio"/> no                                                                                                                                           | Use of cleaning and disinfection plan<br><br><input type="radio"/> yes<br><input type="radio"/> no                                                                                                                                           |
| Cleaning agents?<br><br><input type="radio"/> Surfactants<br><input type="radio"/> Acids<br><input type="radio"/> Bases<br><input type="radio"/> Bleaching agents<br><input type="radio"/> Enzymes                                           | Cleaning agents?<br><br><input type="radio"/> Surfactants<br><input type="radio"/> Acids<br><input type="radio"/> Bases<br><input type="radio"/> Bleaching agents<br><input type="radio"/> Enzymes                                           | Cleaning agents?<br><br><input type="radio"/> Surfactants<br><input type="radio"/> Acids<br><input type="radio"/> Bases<br><input type="radio"/> Bleaching agents<br><input type="radio"/> Enzymes                                           |
| Disinfectants?<br><br><input type="radio"/> Peracetic acid<br><input type="radio"/> Hydrogen peroxide<br><input type="radio"/> Chlorine<br><input type="radio"/> Iodine<br><input type="radio"/> Aldehydes<br><input type="radio"/> Alcohols | Disinfectants?<br><br><input type="radio"/> Peracetic acid<br><input type="radio"/> Hydrogen peroxide<br><input type="radio"/> Chlorine<br><input type="radio"/> Iodine<br><input type="radio"/> Aldehydes<br><input type="radio"/> Alcohols | Disinfectants?<br><br><input type="radio"/> Peracetic acid<br><input type="radio"/> Hydrogen peroxide<br><input type="radio"/> Chlorine<br><input type="radio"/> Iodine<br><input type="radio"/> Aldehydes<br><input type="radio"/> Alcohols |

|                                                                           |                                                                           |                                                                           |
|---------------------------------------------------------------------------|---------------------------------------------------------------------------|---------------------------------------------------------------------------|
| <input type="radio"/> Phenols<br><input type="radio"/> Nitrogen compounds | <input type="radio"/> Phenols<br><input type="radio"/> Nitrogen compounds | <input type="radio"/> Phenols<br><input type="radio"/> Nitrogen compounds |
|---------------------------------------------------------------------------|---------------------------------------------------------------------------|---------------------------------------------------------------------------|

### Assessment of the herd manager

What is the biggest health problem of the herd?

---



---

How many animals do you treat with antibiotics per day on average?

- ☐ <2 per 100 animals treated
- ☐ 2-5 per 100 animals treated
- ☐ 5-10 per 100 animals treated
- ☐ >10 per 100 animals treated

Which antimicrobial ingredients were used in the farm in the last 6 months?

- ☐  $\beta$ -lactam antibiotics (☐ penicillins ☐ cephalosporins)
- ☐ tetracyclines
- ☐ aminoglycosides
- ☐ Polypeptides
- ☐ Macrolides
- ☐ Fenicol
- ☐ Folic acid antagonists
- ☐ Chinolons
