# Supplementary material for: Prevalence and Risk Factors for ESBL/AmpC-E. coli in Pre-Weaned Dairy Calves on Dairy Farms in Germany
Source: Microorganisms. 2021 Oct 12;9(10):2135. doi: 10.3390/microorganisms9102135 (PMC8539614; doi:10.3390/microorganisms9102135)
Supplement: Supplementary file 1 [file microorganisms-09-02135-s001.zip › Supplement_3.pdf]

**Supplement 3:** Responses of the participating farms (total and percentage) to the Questionnaire of the study Prevalence and risk factors for the occurrence of ESBL *E. coli* in pre-weaned dairy calves and their dams on large dairy farms in Germany—a cross-sectional study

|            |                                            | Applicable |      | not applicable |      | no specification |     |
|------------|--------------------------------------------|------------|------|----------------|------|------------------|-----|
|            |                                            | total      | %    | total          | %    | total            | %   |
| <b>1</b>   | Conventional farming                       | 71         | 98,6 | 1              | 1,4  | 0                | 0   |
| <b>2</b>   | Organic farming                            | 1          | 1,4  | 71             | 98,6 | 0                | 0   |
| <b>3</b>   | Cattle husbandry in 3 km radius            | 44         | 61,1 | 26             | 36,1 | 2                | 2,8 |
| <b>4</b>   | Horse husbandry in 3 km radius             | 21         | 29,2 | 49             | 68,1 | 2                | 2,8 |
| <b>5</b>   | Pig husbandry in 3 km radius               | 28         | 38,9 | 42             | 58,3 | 2                | 2,8 |
| <b>6</b>   | Goat/sheep husbandry in 3 km radius        | 7          | 9,7  | 63             | 87,5 | 2                | 2,8 |
| <b>7</b>   | Poultry husbandry in 3 km radius           | 9          | 12,5 | 61             | 84,7 | 2                | 2,8 |
| <b>8</b>   | Regular buy-in of livestock                | 22         | 30,6 | 50             | 69,4 | 0                | 0   |
| <b>8a</b>  | Buy-in > 1 x per month                     | 2          | 2,8  | 70             | 97,2 | 0                | 0   |
| <b>8b</b>  | Buy-in every 1-3 months                    | 11         | 15,3 | 61             | 84,7 | 0                | 0   |
| <b>8c</b>  | Buy-in less than every 3 months            | 3          | 4,2  | 69             | 95,8 | 0                | 0   |
| <b>8d</b>  | From one fixed origin farm                 | 10         | 13,9 | 62             | 86,1 | 0                | 0   |
| <b>8e</b>  | Several, fixed origin farms                | 6          | 8,3  | 66             | 91,7 | 0                | 0   |
| <b>8f</b>  | Several, changing origin farms             | 6          | 8,3  | 66             | 91,7 | 0                | 0   |
| <b>9</b>   | Outsourced heifer rearing                  | 51         | 70,8 | 21             | 29,2 | 0                | 0   |
| <b>9a</b>  | In another location of the own farm        | 29         | 40,3 | 43             | 59,7 | 0                | 0   |
| <b>9b</b>  | In another farm                            | 23         | 31,9 | 49             | 68,1 | 0                | 0   |
| <b>9c</b>  | In several other locations                 | 10         | 13,9 | 62             | 86,1 | 0                | 0   |
| <b>9d</b>  | With other foreign animals                 | 9          | 12,5 | 63             | 87,5 | 0                | 0   |
| <b>10</b>  | In-house production of basic feed          | 40         | 55,6 | 32             | 44,4 | 0                | 0   |
| <b>11</b>  | Purchase of basic feed                     | 29         | 40,3 | 43             | 59,7 | 0                | 0   |
| <b>11a</b> | From one producer                          | 9          | 12,5 | 63             | 87,5 | 0                | 0   |
| <b>11b</b> | From several producers                     | 61         | 84,7 | 11             | 15,3 | 0                | 0   |
| <b>11c</b> | Change more than once a month              | 3          | 4,2  | 69             | 95,8 | 0                | 0   |
| <b>11d</b> | Change every 1- 3 months                   | 3          | 4,2  | 69             | 95,8 | 0                | 0   |
| <b>11e</b> | Change less than every 3 months            | 65         | 90,3 | 7              | 9,7  | 0                | 0   |
| <b>12</b>  | In-house and external manure as fertilizer | 14         | 19,4 | 58             | 80,6 | 0                | 0   |
| <b>13</b>  | Only external manure as fertilizer         | 3          | 4,2  | 69             | 95,8 | 0                | 0   |
| <b>14</b>  | In-house biogas plant                      | 48         | 66,7 | 24             | 33,3 | 0                | 0   |
| <b>14a</b> | Use of in-house material                   | 34         | 47,2 | 38             | 52,8 | 0                | 0   |
| <b>14b</b> | Use of external material                   | 12         | 16,7 | 60             | 83,3 | 0                | 0   |
| <b>14c</b> | Less than 3 suppliers                      | 9          | 12,5 | 63             | 87,5 | 0                | 0   |
| <b>14d</b> | More than 3 suppliers                      | 1          | 1,4  | 71             | 98,6 | 0                | 0   |
| <b>14e</b> | Fixed suppliers                            | 8          | 11,1 | 64             | 88,9 | 0                | 0   |
| <b>14f</b> | Change less than every 3 months            | 3          | 4,2  | 69             | 95,8 | 0                | 0   |
| <b>14g</b> | Manure from cattle farms                   | 3          | 4,2  | 69             | 95,8 | 0                | 0   |
| <b>14h</b> | Manure from pig farms                      | 4          | 5,6  | 68             | 94,4 | 0                | 0   |
| <b>14i</b> | Manure from horse farms                    | 3          | 4,2  | 69             | 95,8 | 0                | 0   |

|            |                                                 |    |      |    |      |   |     |
|------------|-------------------------------------------------|----|------|----|------|---|-----|
| <b>14j</b> | Manure from poultry farms                       | 1  | 1,4  | 71 | 98,6 | 0 | 0   |
| <b>15</b>  | Changing persons have contact to the dairy herd | 72 | 100  | 0  | 0    | 0 | 0   |
| <b>15a</b> | Persons have further animal contact             | 72 | 100  | 0  | 0    | 0 | 0   |
| <b>15b</b> | Use of in-house protective clothing             | 1  | 1,4  | 71 | 98,6 | 0 | 0   |
| <b>16</b>  | Pest control                                    | 67 | 93,1 | 5  | 6,9  | 0 | 0   |
| <b>16a</b> | Rodents                                         | 33 | 45,8 | 39 | 54,2 | 0 | 0   |
| <b>16b</b> | Flies                                           | 2  | 2,8  | 70 | 97,2 | 0 | 0   |
| <b>16c</b> | Rodents and flies                               | 32 | 44,4 | 40 | 55,6 | 0 | 0   |
| <b>17</b>  | Cubicle housing system > 50%                    | 72 | 100  | 0  | 0    | 0 | 0   |
| <b>18</b>  | Flat floors > 50%                               | 38 | 52,8 | 34 | 47,2 | 0 | 0   |
| <b>19</b>  | Slatted floors > 50%                            | 34 | 47,2 | 38 | 52,8 | 0 | 0   |
| <b>20</b>  | High cubicle beds > 50%                         | 31 | 43,1 | 41 | 56,9 | 0 | 0   |
| <b>21</b>  | Low cubicle beds > 50%                          | 37 | 51,4 | 35 | 48,6 | 0 | 0   |
| <b>22</b>  | 50% high/ 50% low cubicle beds                  | 2  | 2,8  | 70 | 97,2 | 0 | 0   |
| <b>23</b>  | Straw                                           | 37 | 51,4 | 35 | 48,6 | 0 | 0   |
| <b>24</b>  | Sawdust                                         | 7  | 9,7  | 65 | 90,3 | 0 | 0   |
| <b>25</b>  | Other bedding material                          | 16 | 22,2 | 56 | 77,8 | 0 | 0   |
| <b>26</b>  | Use of lime                                     | 51 | 70,8 | 21 | 29,2 | 0 | 0   |
| <b>27</b>  | Dry teat cleaning                               | 15 | 20,8 | 57 | 79,2 | 0 | 0   |
| <b>28</b>  | Wet teat cleaning                               | 30 | 41,7 | 42 | 58,3 | 0 | 0   |
| <b>29</b>  | Direct milking                                  | 3  | 4,2  | 69 | 95,8 | 0 | 0   |
| <b>30</b>  | Post-teat treatment                             | 24 | 33,3 | 48 | 66,7 | 0 | 0   |
| <b>31</b>  | Post-teat treatment with Chlorhexidin           | 16 | 22,2 | 56 | 77,8 | 0 | 0   |
| <b>32</b>  | Post-teat treatment with another medium         | 24 | 33,3 | 48 | 66,7 | 0 | 0   |
| <b>33</b>  | Dip                                             | 39 | 54,2 | 33 | 45,8 | 0 | 0   |
| <b>34</b>  | Spray                                           | 29 | 40,3 | 43 | 59,7 | 0 | 0   |
| <b>35</b>  | Milking cluster disinfection after each cow     | 42 | 58,3 | 30 | 41,7 | 0 | 0   |
| <b>36</b>  | Seperate milking parlor for sick cows           | 4  | 5,6  | 68 | 94,4 | 0 | 0   |
| <b>37</b>  | Waste milk cows milked at the end               | 46 | 63,9 | 25 | 34,7 | 1 | 1,4 |
| <b>38</b>  | Benestermycin                                   | 45 | 62,5 | 27 | 37,5 | 0 | 0   |
| <b>39</b>  | Orbenin                                         | 13 | 18,1 | 59 | 81,9 | 0 | 0   |
| <b>40</b>  | Other antibiotic dry therapeutica               | 14 | 19,4 | 58 | 80,6 | 0 | 0   |
| <b>41</b>  | Use of teat sealants                            | 61 | 84,7 | 11 | 15,3 | 0 | 0   |
| <b>42</b>  | Dry period ≥ 42 days                            | 64 | 88,9 | 8  | 11,1 | 0 | 0   |
| <b>43</b>  | Dry period < 42 days                            | 7  | 9,7  | 65 | 90,3 | 0 | 0   |
| <b>44</b>  | Maternal vaccinations                           | 46 | 63,9 | 26 | 36,1 | 0 | 0   |
| <b>44a</b> | Rota/Corona/ <i>E. coli</i>                     | 44 | 61,1 | 28 | 38,9 | 0 | 0   |
| <b>44b</b> | Clostridia                                      | 5  | 6,9  | 67 | 93,1 | 0 | 0   |
| <b>45</b>  | Isolated calving on deep bedding                | 12 | 16,7 | 60 | 83,3 | 0 | 0   |
| <b>46</b>  | Co-calving on deep bedding                      | 67 | 93,1 | 5  | 6,9  | 0 | 0   |

|            |                                       |    |      |    |      |   |   |
|------------|---------------------------------------|----|------|----|------|---|---|
| <b>47</b>  | Co-calving in cubicle system housing  | 2  | 2,8  | 70 | 97,2 | 0 | 0 |
| <b>48</b>  | Co-calving on sand bedding            | 1  | 1,4  | 71 | 98,6 | 0 | 0 |
| <b>49</b>  | Cleaning after each birth             | 2  | 2,8  | 70 | 97,2 | 0 | 0 |
| <b>50</b>  | Cleaning > 1 x per week               | 23 | 31,9 | 49 | 68,1 | 0 | 0 |
| <b>51</b>  | Cleaning < 1 x per week               | 45 | 62,5 | 27 | 37,5 | 0 | 0 |
| <b>52</b>  | Calves < 1 h with dams                | 24 | 33,3 | 48 | 66,7 | 0 | 0 |
| <b>53</b>  | Calves 1-3 h with dams                | 37 | 51,4 | 35 | 48,6 | 0 | 0 |
| <b>54</b>  | Calves > 3 h with dams                | 11 | 15,3 | 61 | 84,7 | 0 | 0 |
| <b>55a</b> | Co-husbandry of calving cows          | 59 | 81,9 | 13 | 18,1 | 0 | 0 |
| <b>55b</b> | Co-husbandry of calving and sick cows | 12 | 16,7 | 60 | 83,3 | 0 | 0 |
| <b>56</b>  | Single calf husbandry                 | 61 | 84,7 | 11 | 15,3 | 0 | 0 |
| <b>57</b>  | Co-husbandry                          | 4  | 5,6  | 68 | 94,4 | 0 | 0 |
| <b>58</b>  | Single and co-husbandry               | 7  | 9,7  | 65 | 90,3 | 0 | 0 |
| <b>59</b>  | Igloo-husbandry                       | 44 | 61,1 | 28 | 38,9 | 0 | 0 |
| <b>60</b>  | Pen-husbandry                         | 21 | 29,2 | 51 | 70,8 | 0 | 0 |
| <b>61</b>  | Mixed Igloo and pen husbandry         | 4  | 5,6  | 68 | 94,4 | 0 | 0 |
| <b>62</b>  | No change in husbandry                | 22 | 30,6 | 50 | 69,4 | 0 | 0 |
| <b>63</b>  | Change after 7 days                   | 11 | 15,3 | 61 | 84,7 | 0 | 0 |
| <b>64</b>  | Change after 14 days                  | 30 | 41,7 | 42 | 58,3 | 0 | 0 |
| <b>65</b>  | Change after 21 days                  | 3  | 4,2  | 69 | 95,8 | 0 | 0 |
| <b>66</b>  | Concrete floor                        | 69 | 95,8 | 3  | 4,2  | 0 | 0 |
| <b>67</b>  | Daily bedded with straw               | 21 | 29,2 | 51 | 70,8 | 0 | 0 |
| <b>68</b>  | Direct contact to other calves        | 62 | 86,1 | 10 | 13,9 | 0 | 0 |
| <b>69</b>  | Calve-feedlot Ratio >1:1              | 2  | 2,8  | 70 | 97,2 | 0 | 0 |
| <b>70</b>  | Further animal contact                | 70 | 97,2 | 2  | 2,8  | 0 | 0 |
| <b>71</b>  | All-in-all-out-principle only ♀       | 2  | 2,8  | 70 | 97,2 | 0 | 0 |
| <b>72</b>  | Colostrum immediately after birth     | 14 | 19,4 | 58 | 80,6 | 0 | 0 |
| <b>72a</b> | Within 3 h after birth                | 45 | 62,5 | 27 | 37,5 | 0 | 0 |
| <b>72b</b> | More than 3 h after birth             | 13 | 18,1 | 59 | 81,9 | 0 | 0 |
| <b>72c</b> | Sucked from the own dam               | 2  | 2,8  | 70 | 97,2 | 0 | 0 |
| <b>72d</b> | Milked from the own dam               | 43 | 59,7 | 29 | 40,3 | 0 | 0 |
| <b>72e</b> | Stored in refrigerator                | 20 | 27,8 | 52 | 72,2 | 0 | 0 |
| <b>72f</b> | Stored in freezer                     | 11 | 15,3 | 61 | 84,7 | 0 | 0 |
| <b>72g</b> | Pasteurized                           | 2  | 2,8  | 70 | 97,2 | 0 | 0 |
| <b>72h</b> | Acidified                             | 3  | 4,2  | 69 | 95,8 | 0 | 0 |
| <b>72i</b> | First meal ≤ 2 L                      | 7  | 9,7  | 65 | 90,3 | 0 | 0 |
| <b>72j</b> | First meal >2 < 4 L                   | 32 | 44,4 | 40 | 55,6 | 0 | 0 |
| <b>72k</b> | First meal ≥ 4 L                      | 33 | 45,8 | 39 | 54,2 | 0 | 0 |
| <b>72l</b> | Drench                                | 38 | 52,8 | 34 | 47,2 | 0 | 0 |
| <b>72m</b> | Nursing bucket                        | 29 | 40,3 | 43 | 59,7 | 0 | 0 |
| <b>72n</b> | Mix of drench and nursing bucket      | 5  | 6,9  | 67 | 93,1 | 0 | 0 |
| <b>773</b> | Quality check colostrum               | 38 | 52,8 | 34 | 47,2 | 0 | 0 |

|            |                                                     |    |      |    |      |   |     |
|------------|-----------------------------------------------------|----|------|----|------|---|-----|
| <b>73a</b> | Refractometer                                       | 27 | 37,5 | 44 | 61,1 | 1 | 1,4 |
| <b>73b</b> | Colostrometer                                       | 10 | 13,9 | 61 | 84,7 | 1 | 1,4 |
| <b>74</b>  | Cows > 3 weeks <i>a.p.</i> present in farm          | 69 | 95,8 | 3  | 4,2  | 0 | 0   |
| <b>75</b>  | Identical feeding ♂ ♀                               | 58 | 80,6 | 14 | 19,4 | 0 | 0   |
| <b>76</b>  | Milk pasteurized                                    | 13 | 18,1 | 59 | 81,9 | 0 | 0   |
| <b>77</b>  | Milk acidified                                      | 15 | 20,8 | 57 | 79,2 | 0 | 0   |
| <b>78</b>  | Milk pasteurized and acidified                      | 6  | 8,3  | 66 | 91,7 | 0 | 0   |
| <b>79</b>  | 2 meals / day                                       | 52 | 72,2 | 20 | 27,8 | 0 | 0   |
| <b>80</b>  | 3 meals / day                                       | 9  | 12,5 | 63 | 87,5 | 0 | 0   |
| <b>81</b>  | > 3 meals / day                                     | 11 | 15,3 | 61 | 84,7 | 0 | 0   |
| <b>82</b>  | < 5 L / day                                         | 44 | 61,1 | 28 | 38,9 | 0 | 0   |
| <b>83</b>  | > 5 L / day                                         | 2  | 2,8  | 70 | 97,2 | 0 | 0   |
| <b>84</b>  | ad libitum feeding                                  | 26 | 36,1 | 46 | 63,9 | 0 | 0   |
| <b>85</b>  | Waste milk + antibiotic residues (WM)               | 12 | 16,7 | 60 | 83,3 | 0 | 0   |
| <b>86</b>  | Raw milk                                            | 8  | 11,1 | 64 | 88,9 | 0 | 0   |
| <b>87</b>  | Milk replacer (MR)                                  | 14 | 19,4 | 58 | 80,6 | 0 | 0   |
| <b>88</b>  | WM + MR                                             | 24 | 33,3 | 48 | 66,7 | 0 | 0   |
| <b>89</b>  | WM + Raw milk                                       | 7  | 9,7  | 65 | 90,3 | 0 | 0   |
| <b>90</b>  | WM + Raw milk + MR                                  | 5  | 6,9  | 67 | 93,1 | 0 | 0   |
| <b>91</b>  | Raw milk + MR                                       | 2  | 2,8  | 70 | 97,2 | 0 | 0   |
| <b>92</b>  | WM as part of the feeding                           | 48 | 66,7 | 24 | 33,3 | 0 | 0   |
| <b>93</b>  | Fixed feeding time                                  | 64 | 88,9 | 8  | 11,1 | 0 | 0   |
| <b>94</b>  | Use of automatic feeder                             | 8  | 11,1 | 64 | 88,9 | 0 | 0   |
| <b>95</b>  | Cleaning of the feeder                              | 59 | 81,9 | 13 | 18,1 | 0 | 0   |
| <b>95a</b> | With water                                          | 21 | 29,2 | 51 | 70,8 | 0 | 0   |
| <b>95b</b> | With cleaning agent                                 | 19 | 26,4 | 53 | 73,6 | 0 | 0   |
| <b>95c</b> | With disinfectant                                   | 4  | 5,6  | 68 | 94,4 | 0 | 0   |
| <b>95d</b> | With cleaning agent + disinfectant                  | 10 | 13,9 | 62 | 86,1 | 0 | 0   |
| <b>95e</b> | After each meal                                     | 15 | 20,8 | 57 | 79,2 | 0 | 0   |
| <b>95f</b> | 1 x per day                                         | 21 | 29,2 | 51 | 70,8 | 0 | 0   |
| <b>95g</b> | < 1 x per day                                       | 23 | 31,9 | 49 | 68,1 | 0 | 0   |
| <b>96</b>  | Supplementary feed                                  | 71 | 98,6 | 1  | 1,4  | 0 | 0   |
| <b>96a</b> | Roughage before 14th day of life                    | 28 | 38,9 | 44 | 61,1 | 0 | 0   |
| <b>96b</b> | Concentrate before 14th day of life                 | 43 | 59,7 | 29 | 40,3 | 0 | 0   |
| <b>96c</b> | Roughage after 14th day of life                     | 17 | 23,6 | 55 | 76,4 | 0 | 0   |
| <b>96d</b> | Concentrate after 14th day of life                  | 22 | 30,6 | 50 | 69,4 | 0 | 0   |
| <b>96e</b> | Only female calves receive roughage and concentrate | 1  | 1,4  | 71 | 98,6 | 0 | 0   |
| <b>97</b>  | Tap water for MR                                    | 23 | 31,9 | 49 | 68,1 | 0 | 0   |
| <b>98</b>  | Well water for MR                                   | 26 | 36,1 | 46 | 63,9 | 0 | 0   |
| <b>99</b>  | Free water access                                   | 61 | 84,7 | 11 | 15,3 | 0 | 0   |
| <b>99a</b> | Tap water                                           | 27 | 37,5 | 45 | 62,5 | 0 | 0   |

|            |                                                          |    |      |    |      |   |     |
|------------|----------------------------------------------------------|----|------|----|------|---|-----|
| <b>99b</b> | Well water                                               | 37 | 51,4 | 35 | 48,6 | 0 | 0   |
| <b>100</b> | ≤ 2 persons take care of the calves                      | 36 | 50   | 36 | 50   | 0 | 0   |
| <b>101</b> | Trained personnel                                        | 60 | 83,3 | 12 | 16,7 | 0 | 0   |
| <b>102</b> | Untrained personnel                                      | 33 | 45,8 | 39 | 54,2 | 0 | 0   |
| <b>103</b> | Constant personnel                                       | 65 | 90,3 | 4  | 5,6  | 3 | 4,2 |
| <b>104</b> | Changing personnel                                       | 7  | 9,7  | 65 | 90,3 | 0 | 0   |
| <b>105</b> | Protective clothing                                      | 15 | 20,8 | 57 | 79,2 | 0 | 0   |
| <b>106</b> | Preventive treatment for calves                          | 61 | 84,7 | 11 | 15,3 | 0 | 0   |
| <b>107</b> | Treatment schedules for calves                           | 44 | 61,1 | 27 | 37,5 | 1 | 1,4 |
| <b>108</b> | Preventive treatment for cows                            | 50 | 69,4 | 22 | 30,6 | 0 | 0   |
| <b>109</b> | Treatment schedules for cows                             | 65 | 90,3 | 7  | 9,7  | 0 | 0   |
| <b>110</b> | Antibiotic treatment for every clinical mastitis         | 36 | 50   | 36 | 50   | 0 | 0   |
| <b>111</b> | Antibiotic treatment <50% of clinical mastitis           | 5  | 6,9  | 67 | 93,1 | 0 | 0   |
| <b>112</b> | Change of antibiotics only after completion of treatment | 51 | 70,8 | 21 | 29,2 | 0 | 0   |
| <b>113</b> | Change of antibiotics ≤ 3 d                              | 21 | 29,2 | 51 | 70,8 | 0 | 0   |
| <b>114</b> | Alternative treatment methods                            | 21 | 29,2 | 51 | 70,8 | 0 | 0   |
| <b>115</b> | Co-husbandry of waste milk cows and the dairy herd       | 16 | 22,2 | 56 | 77,8 | 0 | 0   |
| <b>116</b> | Separate husbandry of waste milk cows                    | 55 | 76,4 | 17 | 23,6 | 0 | 0   |
| <b>117</b> | Use of cleaning agents                                   | 5  | 6,9  | 67 | 93,1 | 0 | 0   |
| <b>118</b> | Dry-through                                              | 5  | 6,9  | 65 | 90,3 | 2 | 2,8 |
| <b>119</b> | Use of disinfectant                                      | 10 | 13,9 | 62 | 86,1 | 0 | 0   |
| <b>120</b> | Use of lime                                              | 18 | 25   | 54 | 75   | 0 | 0   |
| <b>121</b> | Cleaning and disinfectant plan                           | 6  | 8,3  | 66 | 91,7 | 0 | 0   |
| <b>122</b> | Use of cleaning agents                                   | 38 | 52,8 | 34 | 47,2 | 0 | 0   |
| <b>123</b> | Dry-through                                              | 57 | 79,2 | 13 | 18,1 | 2 | 2,8 |
| <b>124</b> | Use of disinfectant                                      | 58 | 80,6 | 14 | 19,4 | 0 | 0   |
| <b>125</b> | Use of lime                                              | 3  | 4,2  | 69 | 95,8 | 0 | 0   |
| <b>126</b> | Cleaning and disinfectant plan                           | 21 | 29,2 | 51 | 70,8 | 0 | 0   |
| <b>127</b> | Use of cleaning agents                                   | 48 | 66,7 | 24 | 33,3 | 0 | 0   |
| <b>128</b> | Dry-through                                              | 5  | 6,9  | 67 | 93,1 | 0 | 0   |
| <b>129</b> | Use of disinfectant                                      | 10 | 13,9 | 62 | 86,1 | 0 | 0   |
| <b>130</b> | Use of lime                                              | 2  | 2,8  | 70 | 97,2 | 0 | 0   |
| <b>131</b> | Cleaning and disinfection plan                           | 18 | 25   | 54 | 75   | 0 | 0   |
| <b>132</b> | Daily antibiotic use on <2/100 animals                   | 65 | 90,3 | 5  | 6,9  | 2 | 2,8 |
| <b>133</b> | Daily antibiotic use on 2-5/100 animals                  | 5  | 6,9  | 65 | 90,3 | 2 | 2,8 |
| <b>134</b> | Use of beta-lactam antibiotics                           | 72 | 100  | 0  | 0    | 0 | 0   |
| <b>135</b> | Use of Tetracyclines                                     | 67 | 93,1 | 5  | 6,9  | 0 | 0   |
| <b>136</b> | Use of Aminoglycosides                                   | 62 | 86,1 | 9  | 12,5 | 1 | 1,4 |

|            |                                |    |      |    |      |   |     |
|------------|--------------------------------|----|------|----|------|---|-----|
| <b>137</b> | Use of Polypeptide antibiotics | 0  | 0    | 72 | 100  | 0 | 0   |
| <b>138</b> | Use of Macrolides              | 20 | 27,8 | 51 | 70,8 | 1 | 1,4 |
| <b>139</b> | Use of Fenicols                | 29 | 40,3 | 42 | 58,3 | 1 | 1,4 |
| <b>140</b> | Use of Folic acid antagonists  | 40 | 55,6 | 31 | 43,1 | 1 | 1,4 |
| <b>141</b> | Use of Quinolones              | 40 | 55,6 | 31 | 43,1 | 1 | 1,4 |

---
